# Supplementary material
Source: PubMed Central journal article supplement (PMC8346849)
Supplement: pnas.2112089118.sapp.pdf [file pnas.2112089118.sapp.pdf]

|       | Production | Specific Combustion Energy | Total Combustion Energy | Carbon Content |       | Hydrogen Content |       | CO <sub>2</sub> emissions (combustion) |
|-------|------------|----------------------------|-------------------------|----------------|-------|------------------|-------|----------------------------------------|
|       | MT/yr      | MJ/kg                      | EJ/yr                   | MT/yr          | EJ/yr | MT/yr            | EJ/yr | MT/yr                                  |
| Oil   | 4,200      | 44                         | 185                     | 3,600          | 119   | 600              | 85    | 12,200                                 |
| Gas   | 2,500      | 55                         | 138                     | 1,900          | 63    | 600              | 85    | 6,800                                  |
| Coal  | 7,500      | 20                         | 150                     | 4,800          | 158   | 100              | 14    | 16,300                                 |
| Total |            |                            | 473                     | 10,300         | 340   | 1,300            | 184   | 35,300                                 |

**Table 1:** Yearly production of carbon, hydrogen, and energy via oil, gas, and coal (from IEA World Energy Outlook). For natural gas, most of the energy is contained in the hydrogen. The energies of combustion of carbon and hydrogen are ~33 MJ/kg and ~142 MJ/kg, respectively. Most fossil coal is lignite, which has low carbon content (~60%) and 3 to 5% hydrogen. The total combustion energy of oil, gas, and coal (column 4) is not the same as the combustion energy of their carbon (column 6) and hydrogen (column 8) components; the difference is the standard energy of formation of their constituent hydrocarbons (e.g., 4.7 MJ/kg for methane).

|          | Density           | Cost   | Embodied Energy |                   | CO <sub>2</sub> footprint |                                   | Yearly Production | Yearly energy consumption | Yearly CO <sub>2</sub> emissions |
|----------|-------------------|--------|-----------------|-------------------|---------------------------|-----------------------------------|-------------------|---------------------------|----------------------------------|
|          | kg/m <sup>3</sup> | USD/kg | MJ/kg           | GJ/m <sup>3</sup> | kg CO <sub>2</sub> /kg    | T CO <sub>2</sub> /m <sup>3</sup> | MT/yr             | EJ/yr                     | MT/yr                            |
| Steel    | 7,800             | 0.8    | 30              | 6.2               | 1.8                       | 14                                | 1,600             | 48                        | 2,900                            |
| Aluminum | 2,700             | 2      | 210             | 567               | 12                        | 24                                | 60                | 12.6                      | 720                              |
| Copper   | 9,000             | 6      | 60              | 54                | 3.7                       | 33                                | 20                | 1.2                       | 74                               |
| C-Fibers | 1,800             | 30-200 | 370             | 666               | 25                        | 45                                | 0.1               | 0.037                     | 2.5                              |
| Concrete | 2,500             | 0.05   | 1.2             | 3                 | 0.12                      | 0.3                               | 16,000            | 19.2                      | 1,900                            |

**Table 2:** Properties, embodied energies and CO<sub>2</sub> footprints, and yearly production of main industrial materials (adapted from Ref. 4 and the United States Geological Survey). Within the same class of materials (e.g., steel), there are subclasses with major markets and significantly higher economic value and energy and CO<sub>2</sub> footprints. For example, stainless steel is produced at 50 MT/yr of and sold at 3 to 8 USD/kg; its energy and CO<sub>2</sub> intensity are about three times higher than low carbon steel. CO<sub>2</sub> footprints are given on a by weight and by volume basis, because materials are traded on a mass basis but used on the basis of function, that tracks more closely with volumetric properties. Because of this accounting, heavier materials appear to be cheaper and less environmentally impactful. Most of the concrete emissions are due to cement production; however, cement alone is not used as a structural material.
